# Supplementary material for: Growth phase-dependent reorganization of cryptophyte photosystem I antennae
Source: PubMed Central journal article supplement (PMC11088674; doi:10.1038/s42003-024-06268-5), 2024-05-11
Supplement: 42003_2024_6268_MOESM3_ESM.pdf [file 42003_2024_6268_MOESM3_ESM.pdf]

To view the full contents of this document, you need a later version of the PDF viewer. You can upgrade to the latest version of Adobe Reader from [www.adobe.com/products/acrobat/readstep2.html](http://www.adobe.com/products/acrobat/readstep2.html)

For further support, go to [www.adobe.com/support/products/acrreader.html](http://www.adobe.com/support/products/acrreader.html)
